# Supplementary material
Source: PubMed Central journal article supplement (PMC6931903)
Supplement: NIHMS1061805-supplement-supplemental_material_1.pdf [file NIHMS1061805-supplement-supplemental_material_1.pdf]

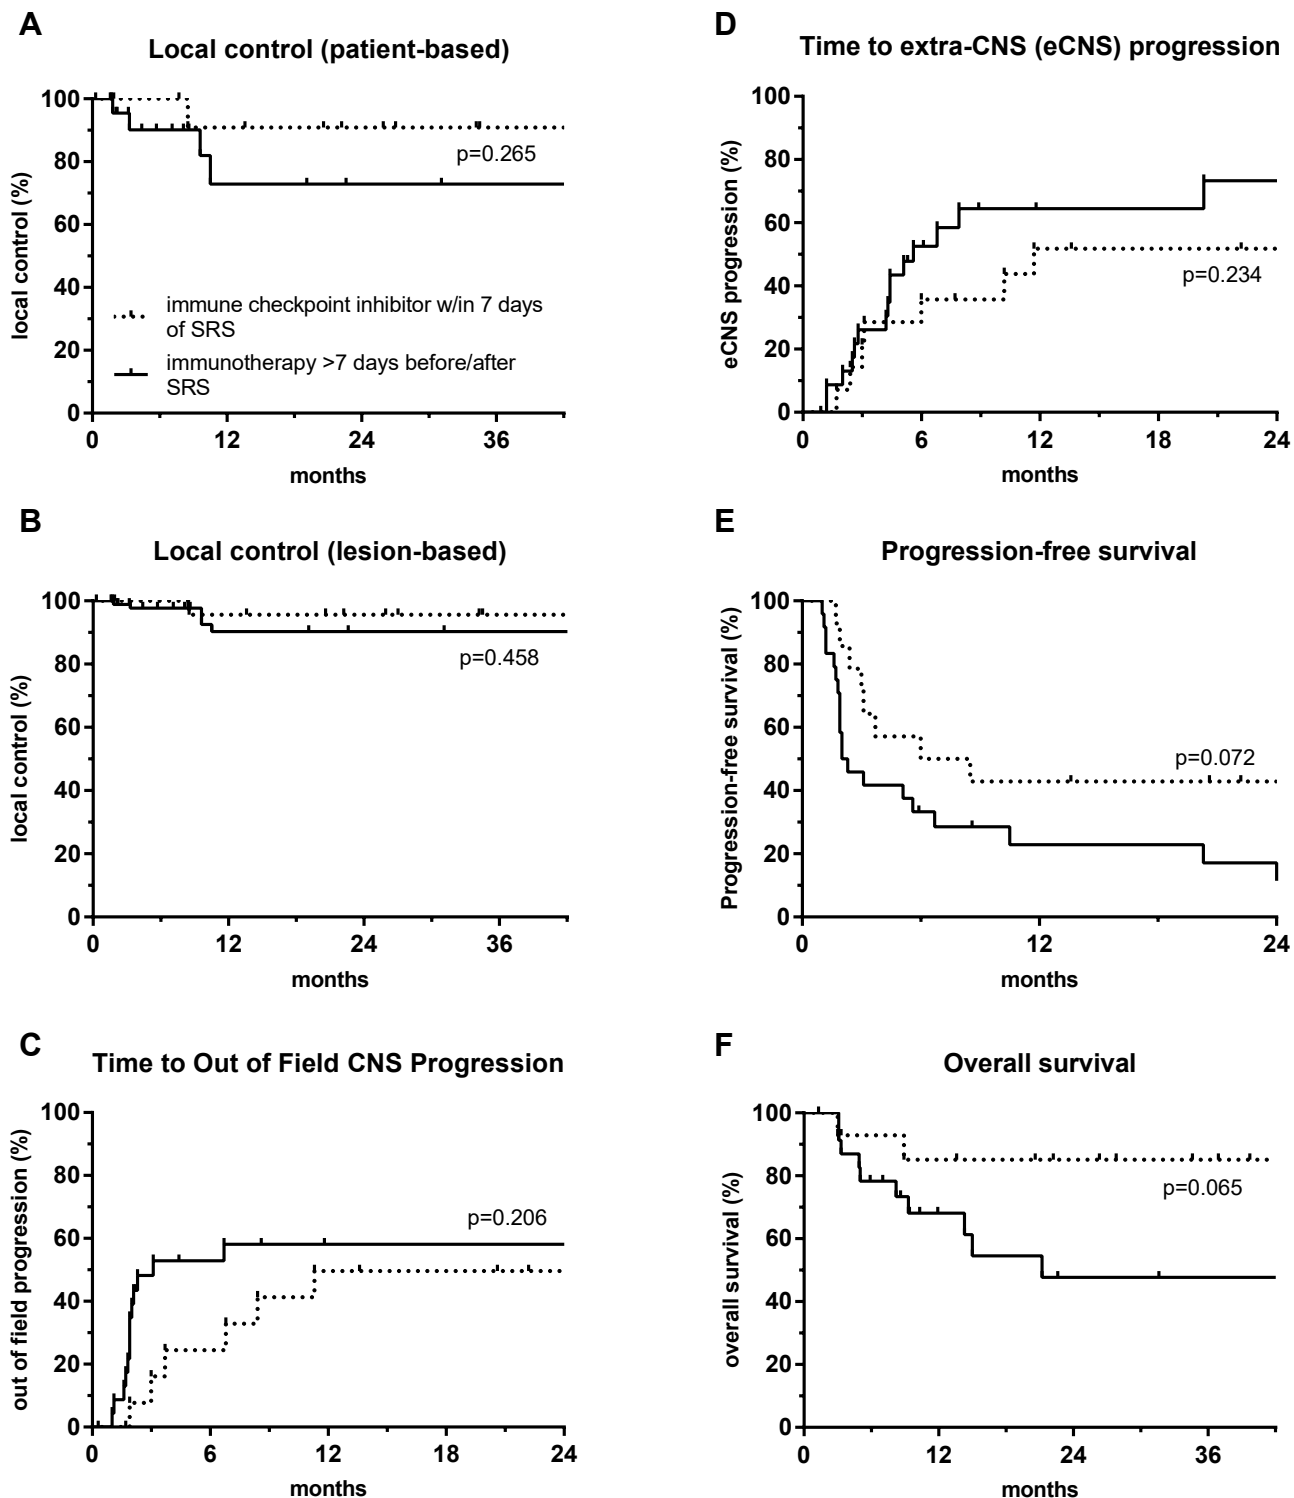

**Supplemental figure 1.** Kaplan-meier analysis of (A) patient-based local control, (B) lesion-based local control, (C) out of field central nervous system (CNS) progression, (D) extra-CNS (eCNS) progression, (E) progression-free survival, and (F) overall survival, for patients receiving immune checkpoint inhibitors within 8 weeks of radiosurgery, stratified by timing of immune checkpoint inhibitor and SRS. SRS: Stereotactic Radiosurgery.
