# Supplementary material
Source: PubMed Central journal article supplement (PMC6931903)
Supplement: NIHMS1061805-supplement-supplemental_material_2.pdf [file NIHMS1061805-supplement-supplemental_material_2.pdf]

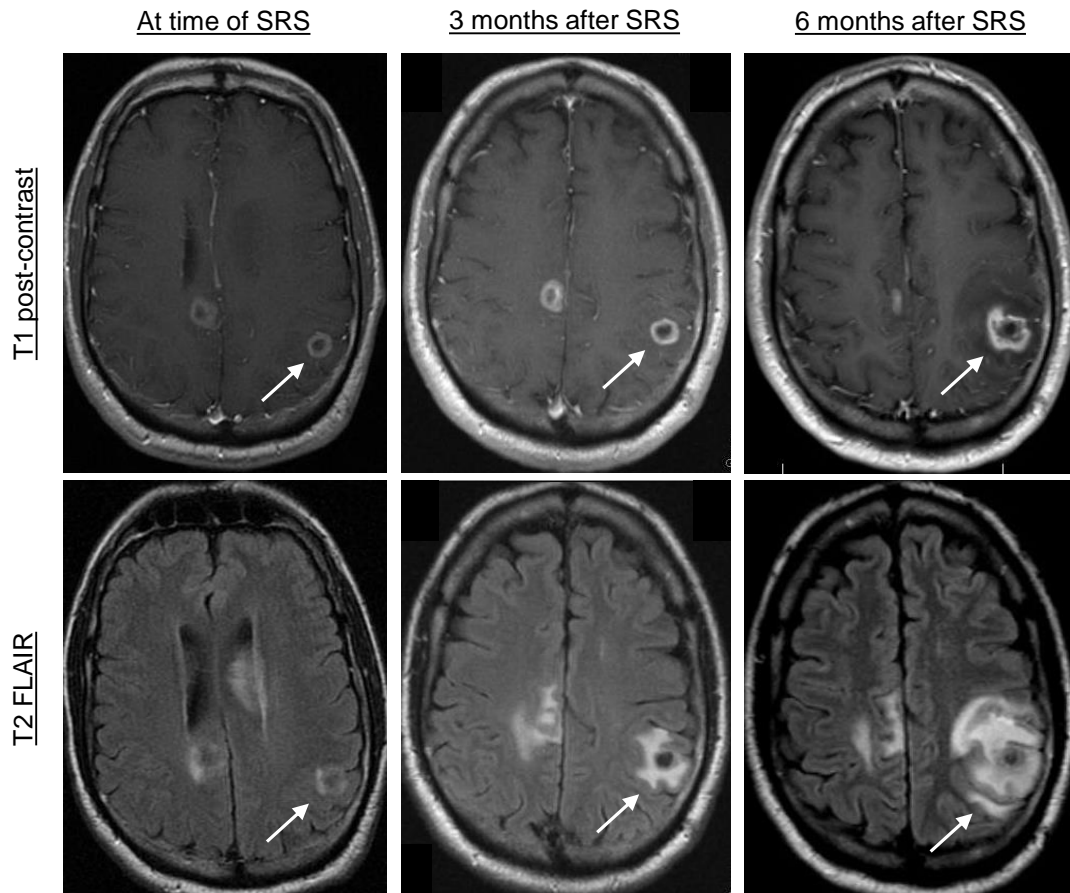

**Supplemental figure 2.** Representative example of radiographic changes observed in patients that developed radiation necrosis requiring surgical resection. Six months after SRS, this patient underwent resection of the lesion shown above with final pathology demonstrating only extensive necrosis without evidence of viable tumor.
